# Supplementary material for: Development of a microencapsulated Al–Si phase change material with high-temperature thermal stability and durability over 3000 cycles
Source: Royal Society of Chemistry journal article supplement (doi:10.1039/c8ta04708a), 2018-01-01
Supplement: c8ta04708a1.pdf [file c8ta04708a1.pdf]

## Electronic Supporting information

# Development of microencapsulated Al-Si phase change material with high-temperature thermal stability and 3000 cycles durability

Nan Sheng<sup>a†</sup>, Chunyu Zhu<sup>a</sup>, Genki Saito<sup>a</sup>, Takehito Hiraki<sup>b</sup>, Miki Haka<sup>a</sup>, Yuta Hasegawa<sup>a</sup>, Hiroki Sakai<sup>a</sup>, Kaixin Dong<sup>a</sup>, Tomohiro Akiyama<sup>a</sup>, and Takahiro Nomura<sup>a†</sup>

*Center for Advanced Research of Energy and Materials, Hokkaido University, Kita 13 Nishi 8, Kita-ku, Sapporo, 060-8628 Japan*  
*Graduate School of Engineering, Tohoku University, Sendai 980-8578, Japan*

† Corresponding author.

Tel.: +81 11 706 6842; Fax: +81 11 706 6849

E-mail: nms-tropy@eng.hokudai.ac.jp (T. Nomura); s\_nan@eng.hokudai.ac.jp (N. Sheng)

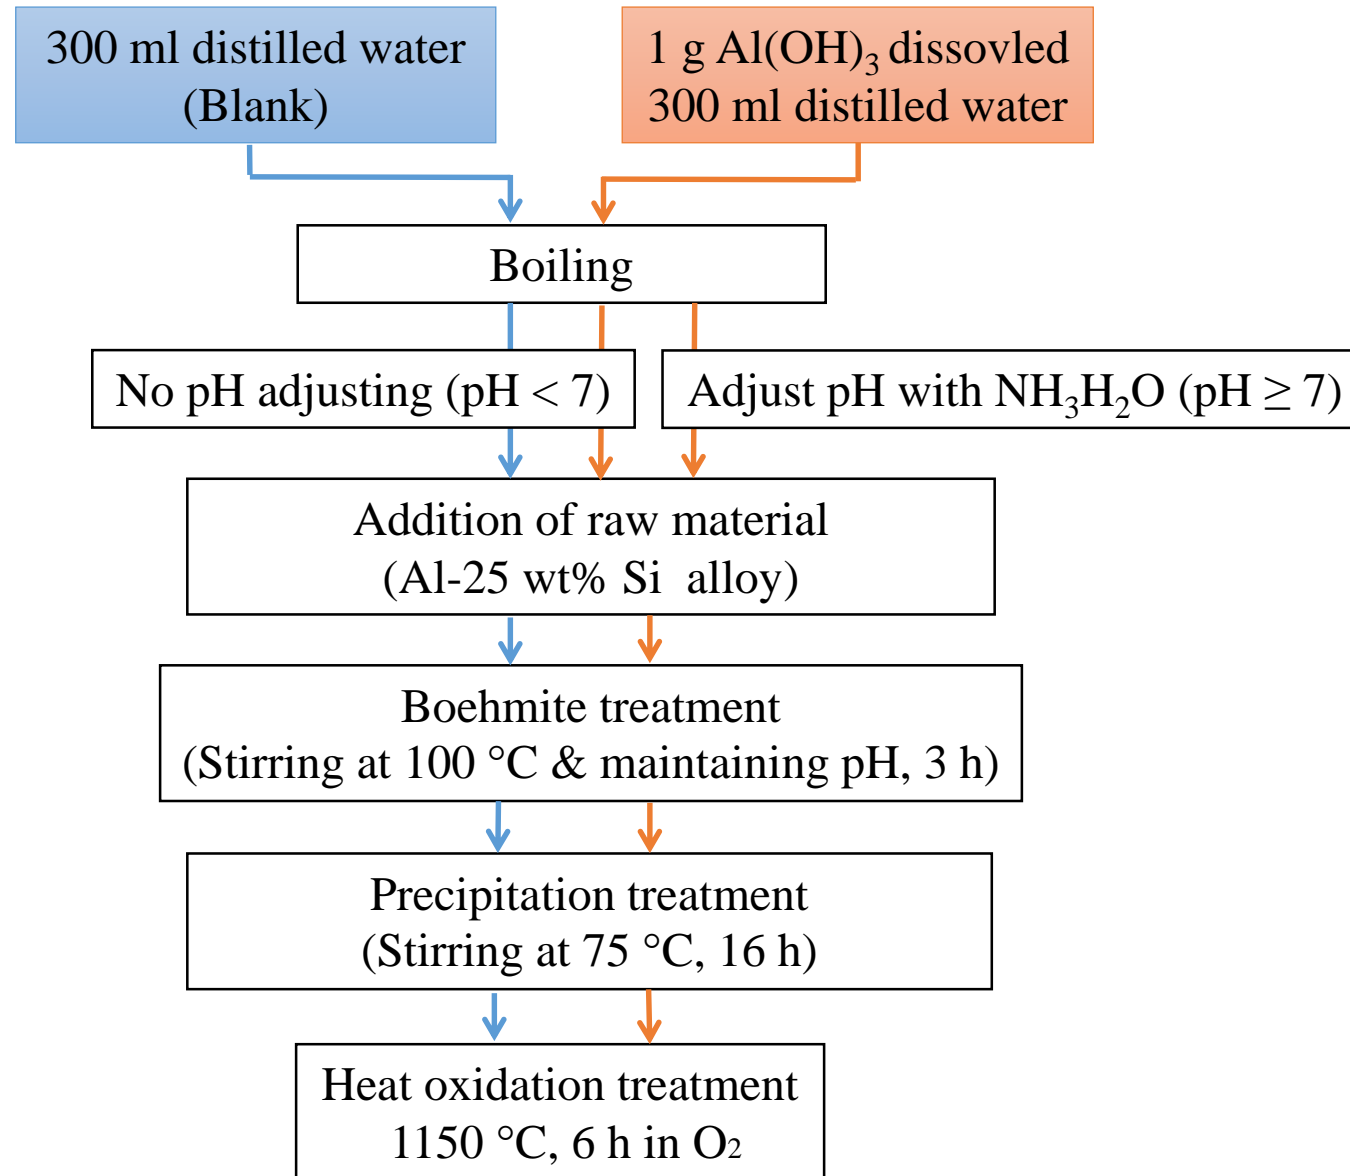

Figure S1. Procedures for the preparation of Al-Si/Al<sub>2</sub>O<sub>3</sub> core/shell MEPCM particles.

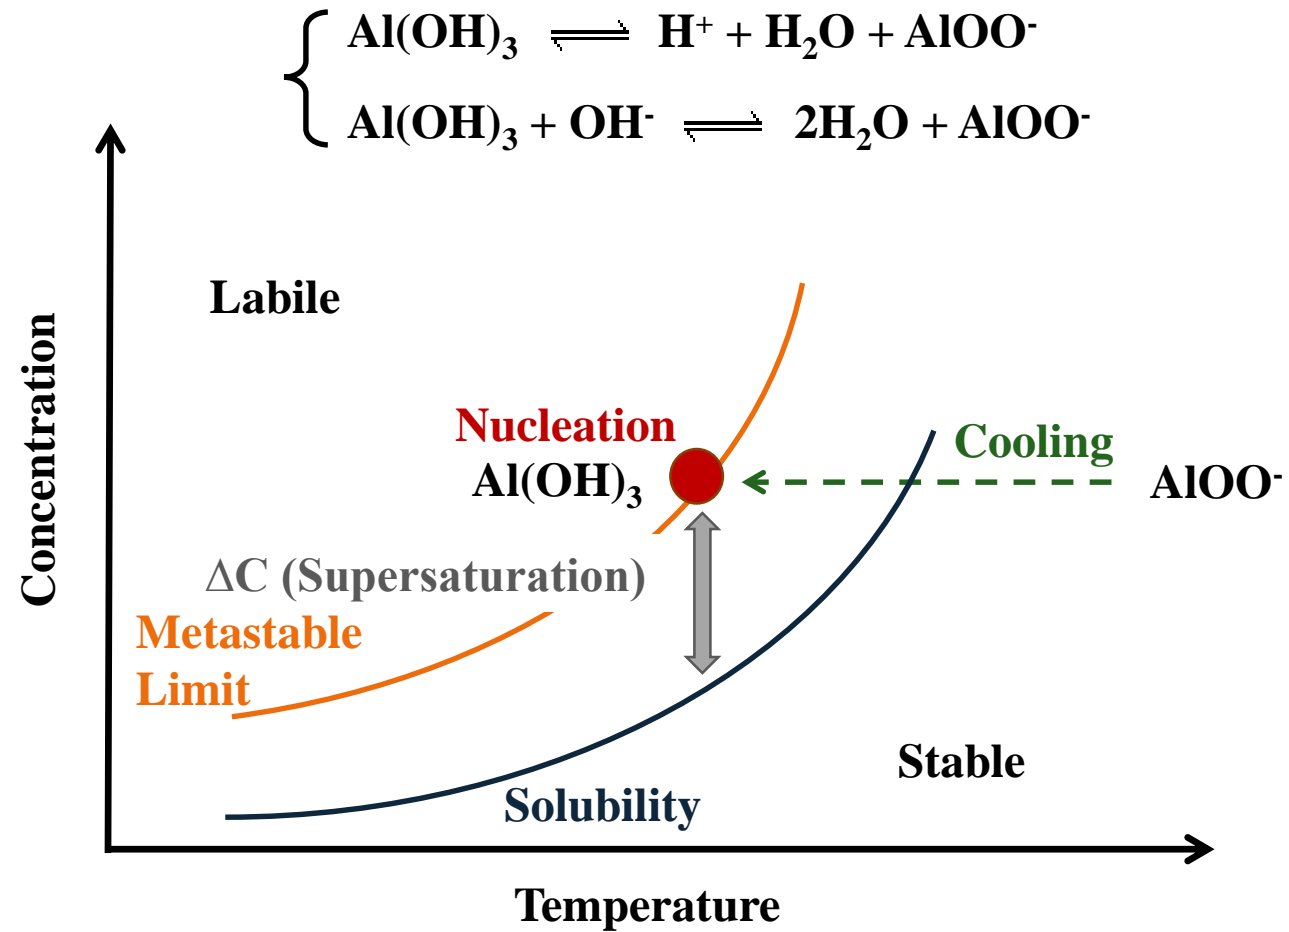

Figure S2. Typical solubility plot

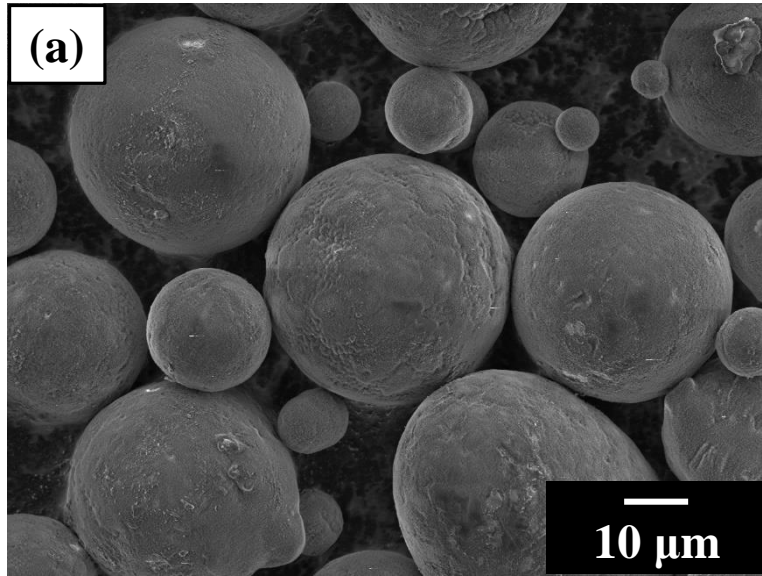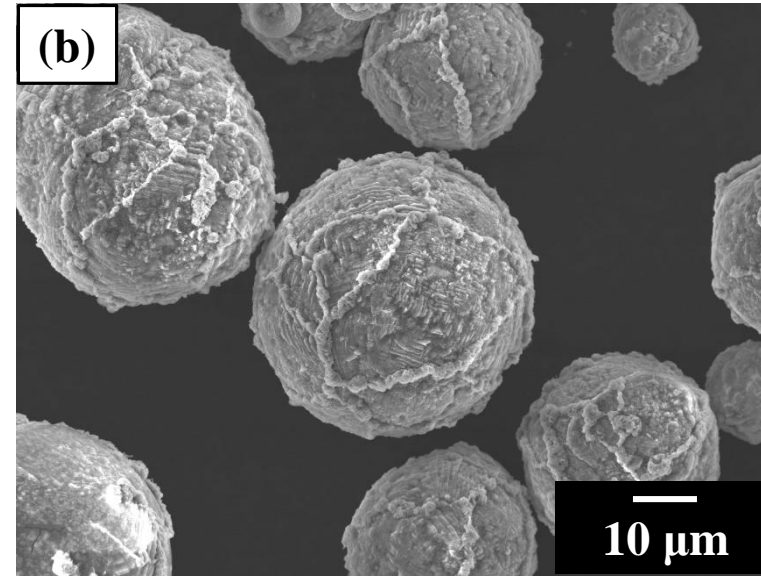

Figure S3. SEM views of Al-25 wt.% Si (a) after 3 h of boehmite treatment, and (b) after 3 h of boehmite treatment followed by 6 h of heat oxidation at 1150 °C.

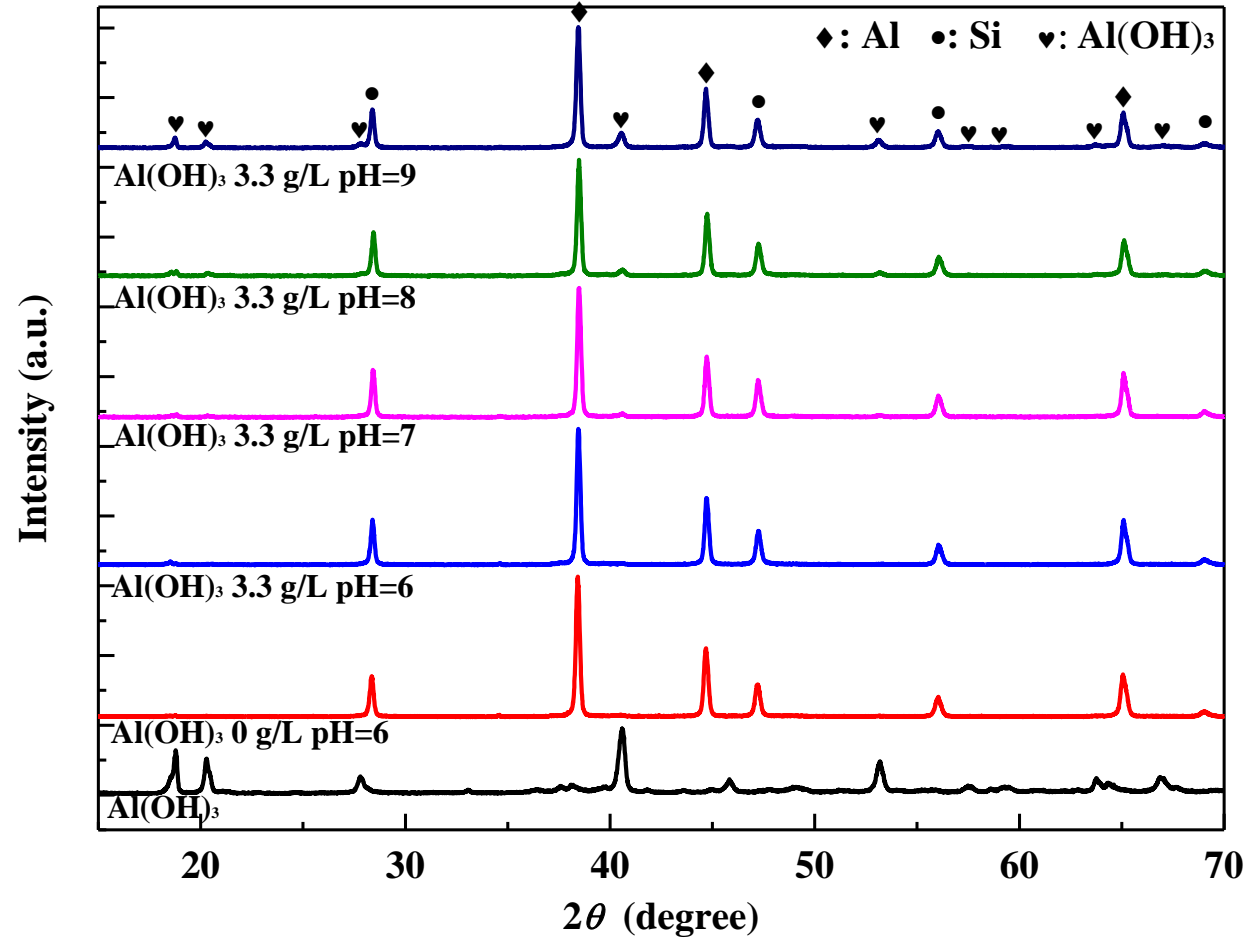

Figure S4. XRD patterns of PCM particles after boehmite and precipitation treatment. The sample of raw  $\text{Al}(\text{OH})_3$  is also shown as a comparison.

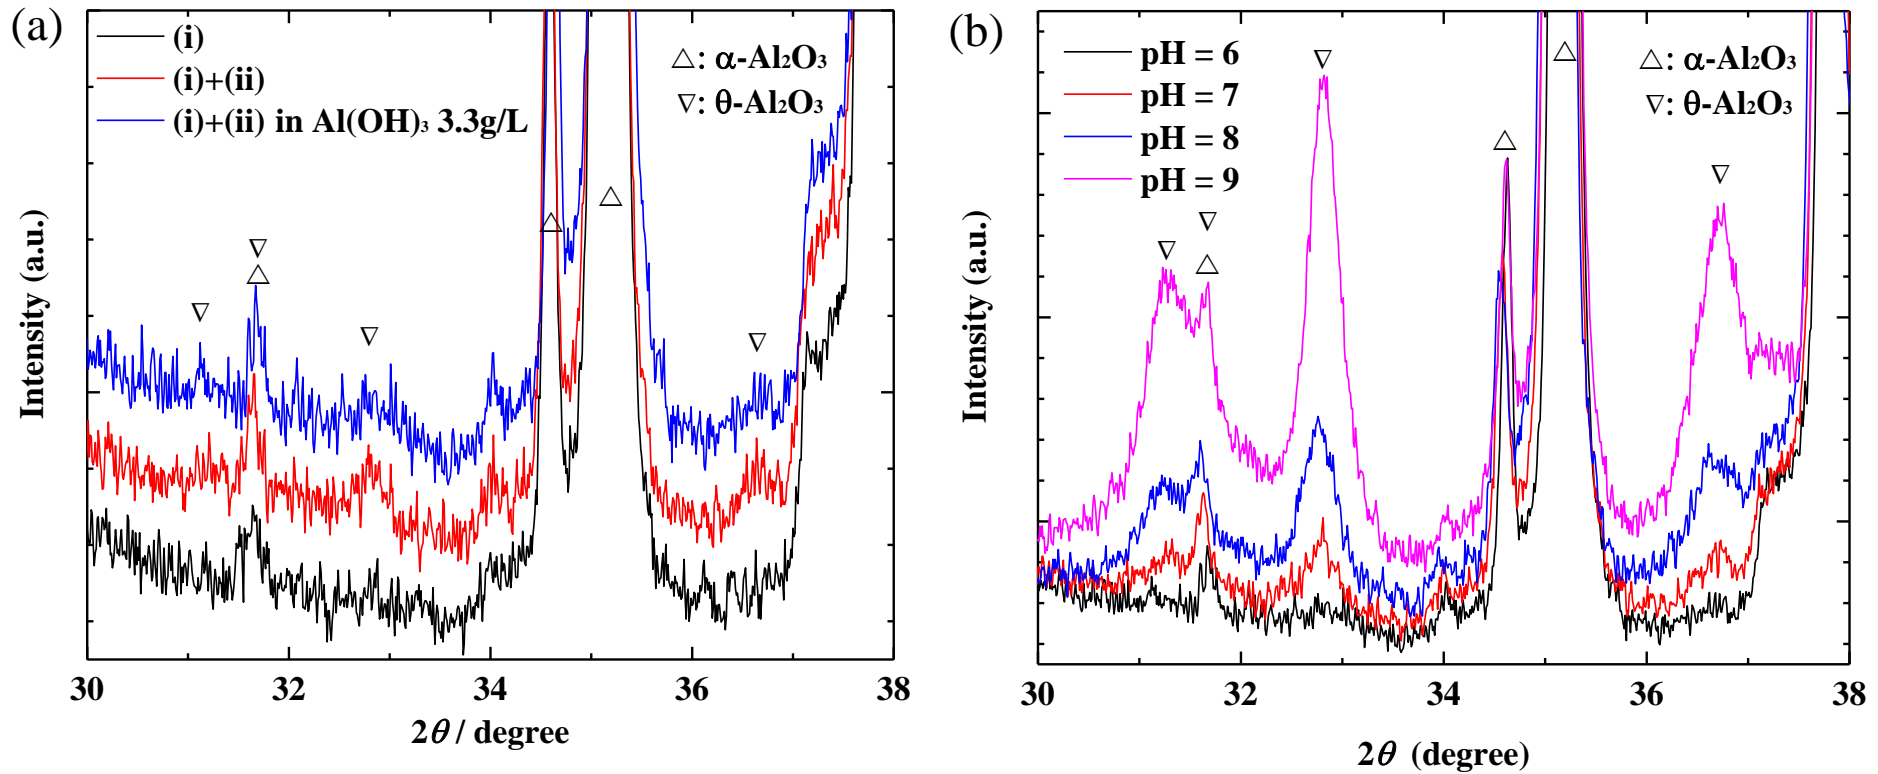

Figure S5. Enlarged XRD spectra from Figure 3. (a) the final samples obtained after heat-oxidation, which were previously subjected to only boehmite treatments (i), boehmite and precipitation treatments without Al(OH)<sub>3</sub>-addition, (i+ii) boehmite and precipitation treatments with Al(OH)<sub>3</sub>-addition with pH value of 6. (b) The final samples obtained after heat-oxidation, which were previously subjected to both boehmite and precipitation treatments as-conducted with Al(OH)<sub>3</sub>-added solutions with different pH values;

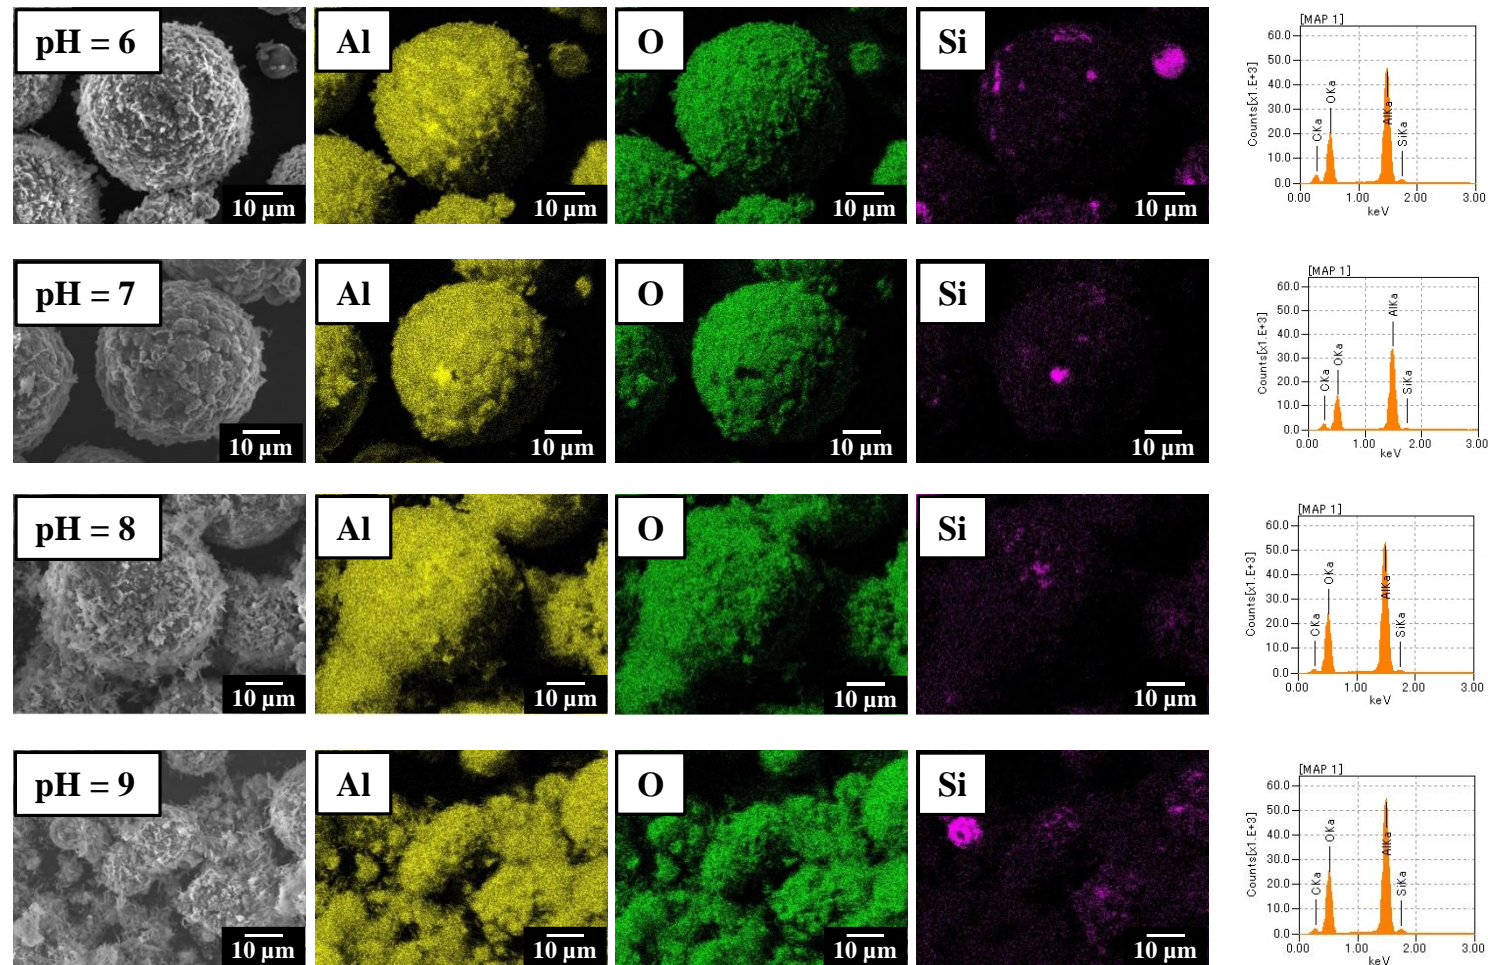

Figure S6. EDS elemental mapping and spectra of MEPCMs after 100 melting-solidification cycles. The samples were subjected to a boehmite treatment during their synthesis process at pH 6, 7, 8, and 9, respectively.

Table S1. Latent heat and phase change temperature of PCM calculated from DSC curves.

|                                        | pH       | L (J·g <sup>-1</sup> ) |                       |                        |                        |  | T <sub>m</sub> (°C)   |                       |                        |                        |
|----------------------------------------|----------|------------------------|-----------------------|------------------------|------------------------|--|-----------------------|-----------------------|------------------------|------------------------|
| <b>Raw Material*1</b>                  | --       | 432                    |                       |                        |                        |  | 577                   |                       |                        |                        |
| <b>MEPCM*2</b>                         | <b>6</b> | 257                    |                       |                        |                        |  | 578                   |                       |                        |                        |
|                                        |          | <b>1150 °C<br/>6h</b>  | <b>100<br/>cycles</b> | <b>1000<br/>cycles</b> | <b>3000<br/>cycles</b> |  | <b>1150 °C<br/>6h</b> | <b>100<br/>cycles</b> | <b>1000<br/>cycles</b> | <b>3000<br/>cycles</b> |
| <b>Al(OH)<sub>3</sub> 0 g/ L</b>       | <b>6</b> | 246                    | 257                   | --                     | --                     |  | 578                   | 579                   | --                     | --                     |
| <b>Al(OH)<sub>3</sub><br/>3.3 g/ L</b> | <b>6</b> | 251                    | 243                   | --                     | --                     |  | 578                   | 578                   | --                     | --                     |
|                                        | <b>7</b> | 199                    | 198                   | 197                    | --                     |  | 578                   | 578                   | 578                    | --                     |
|                                        | <b>8</b> | 183                    | 183                   | 183                    | 180                    |  | 578                   | 577                   | 578                    | 577                    |
|                                        | <b>9</b> | 181                    | 171                   | --                     | --                     |  | 578                   | 578                   | --                     | --                     |

\*1: Same as Ref. 46

\*2: Condition: 3h boehmite treatment then 1150 °C, 6 h heat-oxidation.



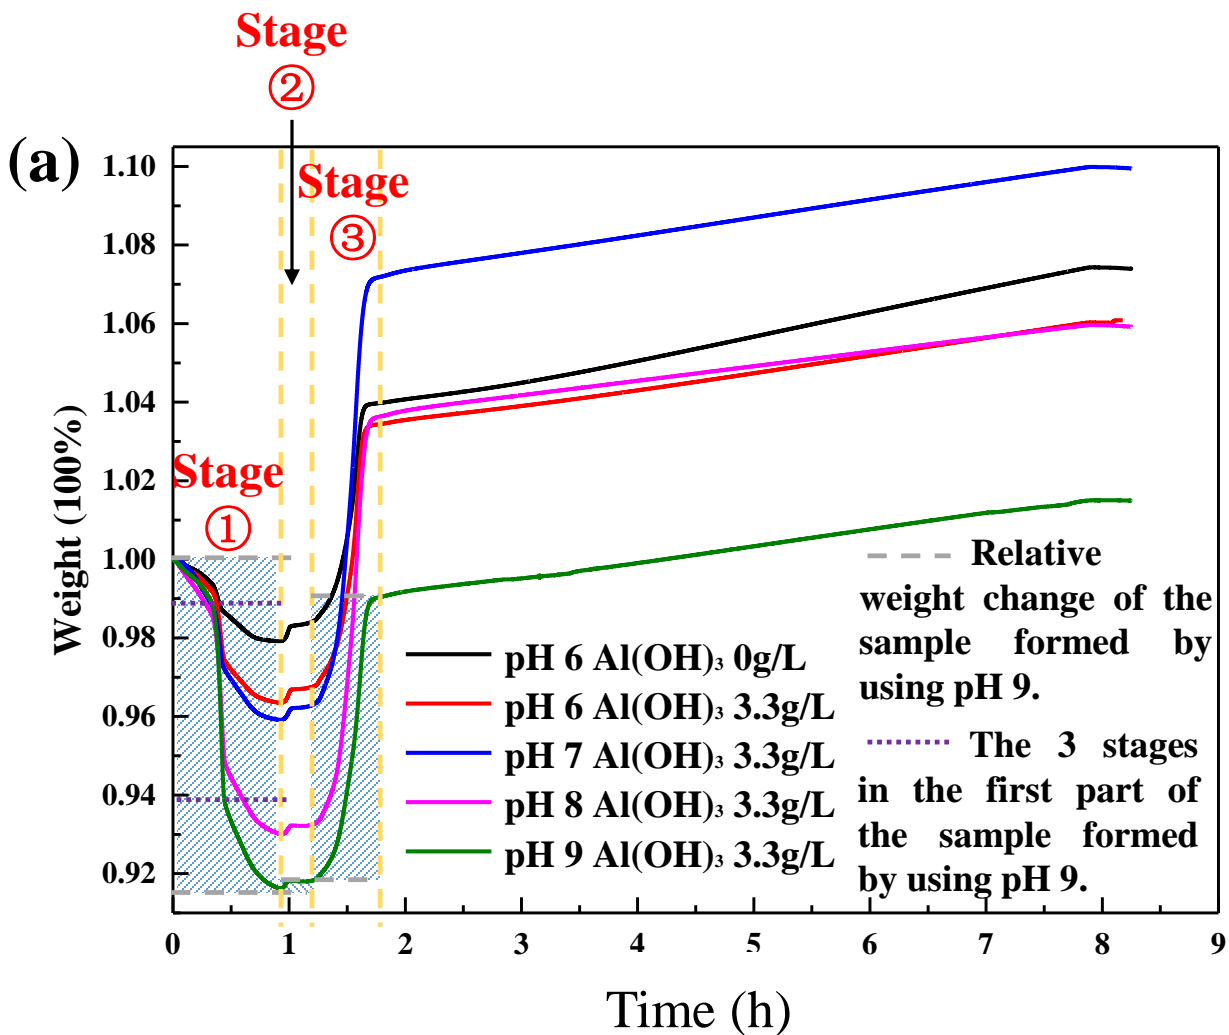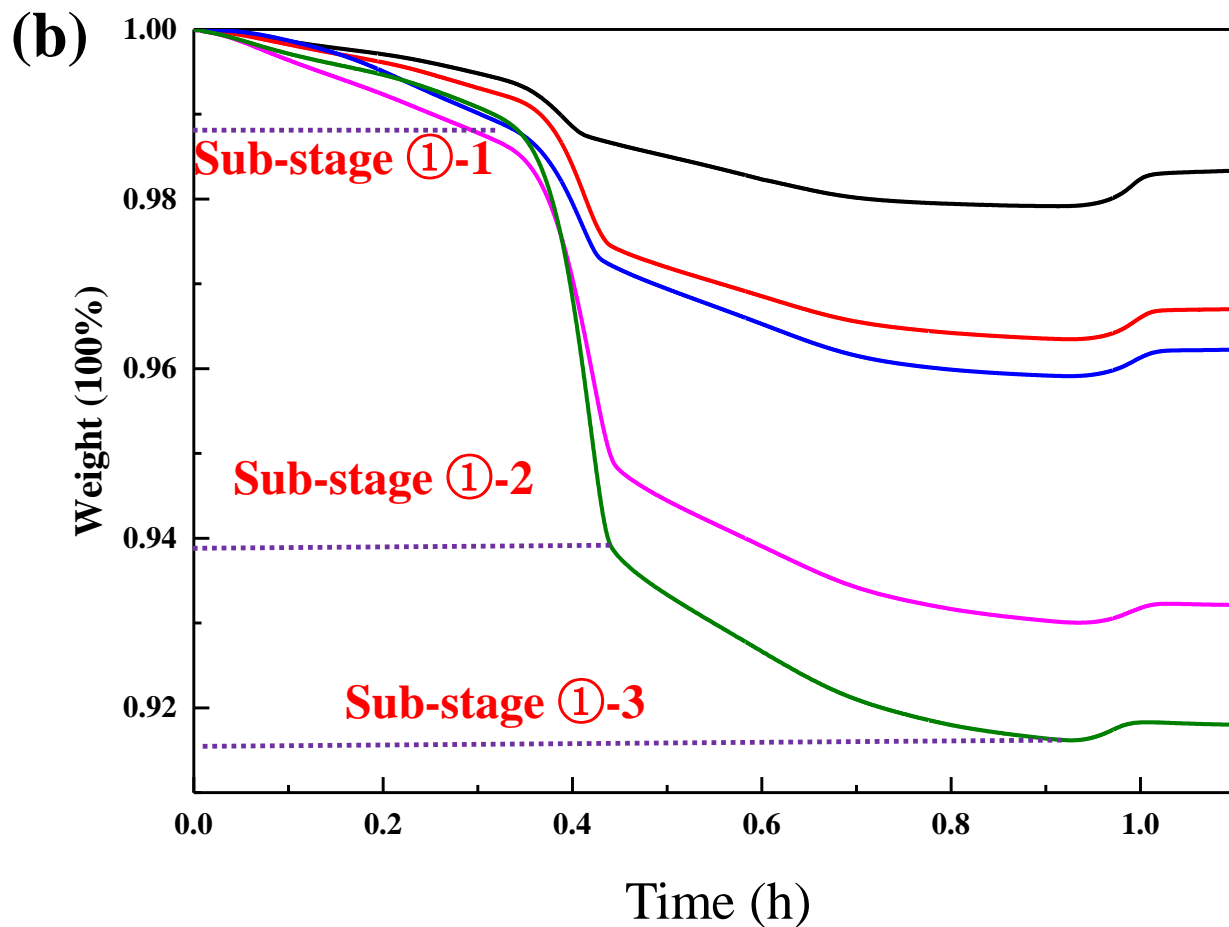

Figure S7. Thermogravimetric (TG) curve during heat-oxidation of the precursor samples obtained with different boehmite treatment (left figure). The right figure is the enlargement of the part from 1 – 4000 s.
